# Supplementary material
Source: PubMed Central journal article supplement (PMC4576939)

## Supplementary Data

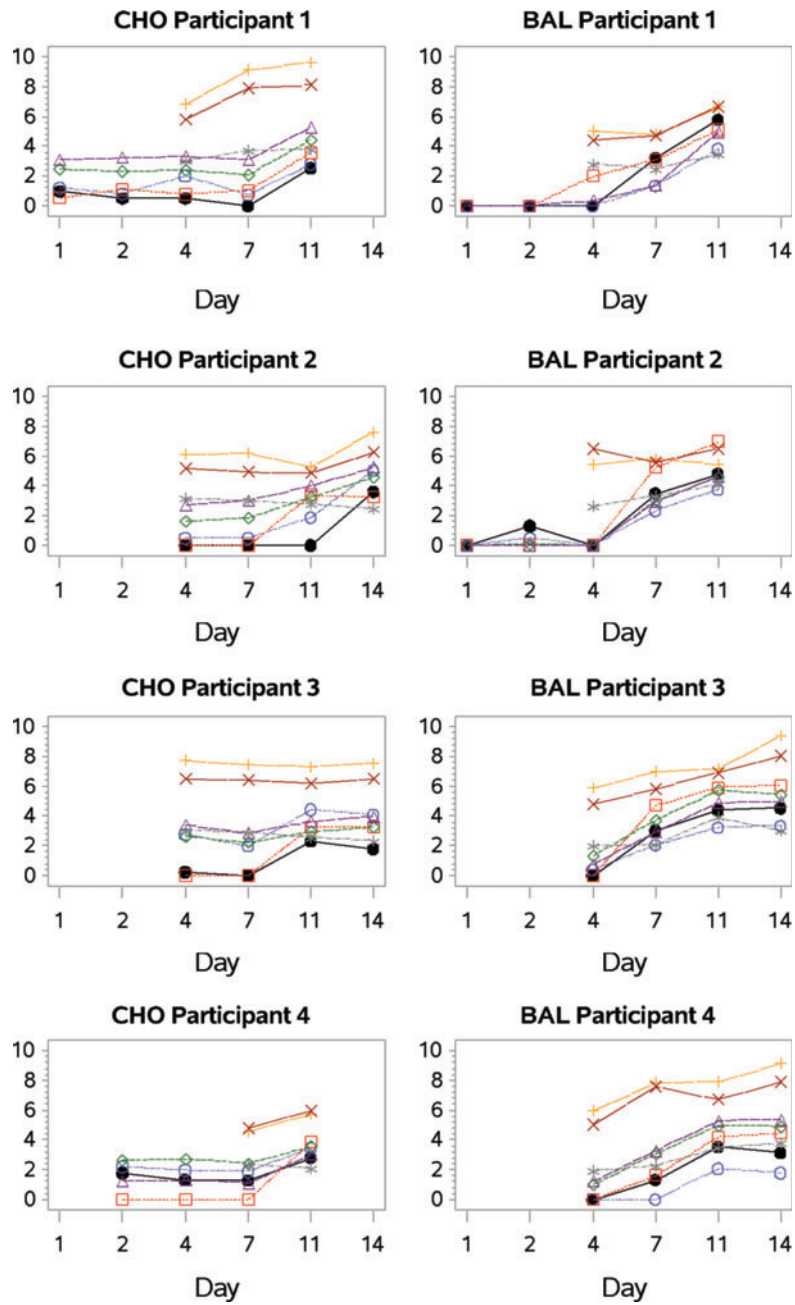

SUPPLEMENTARY FIG. S1. Assays by individual participant.

Supplement: Supp_Fig1.pdf [file Supp_Fig1.pdf]
